# Supplementary material for: Neutrophil-to-lymphocyte ratio after neoadjuvant chemotherapy as an independent prognostic factor in patients with esophageal squamous cell carcinoma
Source: PubMed Central journal article supplement — Oncol Lett. 2022 Dec 20;25(2):58. doi: 10.3892/ol.2022.13644 (PMC9827446; doi:10.3892/ol.2022.13644), 2022-12-20

Figure S1. (A) ROC curve analysis for the optimal cutoff pre-NLR value which discriminated between clinical response PR-CR and PD-SD. (B) ROC curve analysis for the optimal cutoff post-NLR value which discriminated between clinical response PR-CR and PD-SD. NLR, neutrophil-to-lymphocyte ratio; ROC, receiver operating characteristic; PR, partial response; CR, complete response; PD, progressive disease; SD, stable disease.

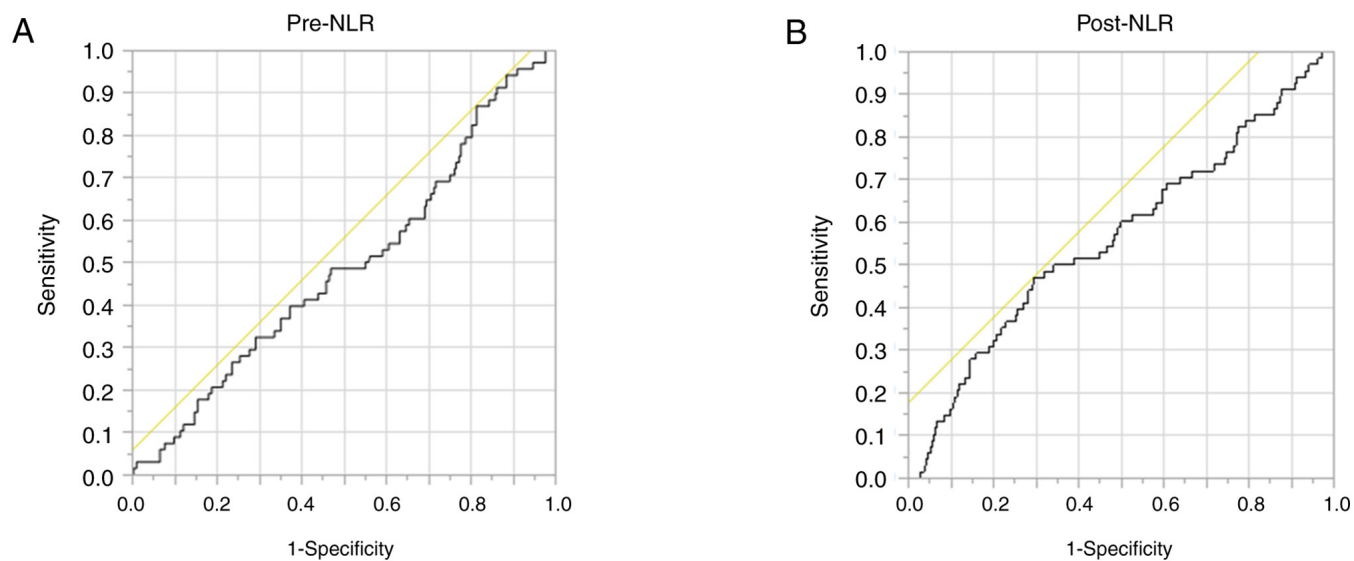

Supplement: Supplementary_Data.pdf [file Supplementary_Data.pdf]
